# Supplementary material
Source: PubMed Central journal article supplement (PMC2851137)

**Molecular Cell, Volume 37**

## **Supplemental Information**

### **tRNA Binds to Cytochrome *c* and Inhibits Caspase Activation**

**Yide Mei, Jeongsik Yong, Hongtu Liu, Yigong Shi, Judy Meinkoth,  
Gideon Dreyfuss, and Xiaolu Yang**

#### **Supplemental Figure Legends**

##### **Figure S1. The intrinsic apoptosis pathway (related to Figures 1, 2, 3, 5, 6, and 7)**

Various intracellular apoptotic stimuli provoke the release of cytochrome *c* (cyt. *c*) from mitochondria (a). In the cytosol, cytochrome *c* binds to Apaf-1, promoting the hydrolysis of Apaf-1-bound dATP to dADP. This is followed by the release of dADP in exchange for dATP and the assembly of Apaf-1 into a heptameric complex known as the apoptosome (b, only two molecules of Apaf-1 are shown). The apoptosome recruits and oligomerizes procaspase-9 (pro-C9) (c), leading to the auto-proteolytic processing of procaspase-9 to the mature caspase-9 (d). Mature caspase-9 then converts procaspase-3 (pro-C3), which pre-exists as a dimer, to the active form (e).

##### **Figure S2. Cytochrome *c* induces caspase-9 and caspase-3 activation in Jurkat S100 extract (related to Figure 1)**

Jurkat S100 extracts were incubated with cytochrome *c* (cyt. *c*) (20 µg/ml) at 37 °C for the indicated time periods. The activation of caspase-9 and -3 in the extracts was analyzed by Western blots. The amount of actin in the extracts is shown for equivalent sample loading. Molecular weight standards (in kDa) are marked on the left.

**Figure S3. Onconase treatment enhances cytochrome *c*-induced caspase-9 activation (related to Figure 7)**

(A) HeLa S100 extracts were pre-incubated with indicated amounts of onconase (Onc) for 20 min at room temperature. Left: RNA was resolved on denaturing PAGE and stained with ethidium bromide. Right: extracts were further incubated with cytochrome *c* (20  $\mu\text{g/ml}$ ) at 37 °C for an additional 1 h, and analyzed for caspase-9 and -3 activation.

(B) tRNA degradation in onconase and doxorubicin-treated cells. Total RNA from the HeLa cells treated with onconase and/or doxorubicin (Figure 7C) was resolved on 8% urea-containing PAGE and visualized by ethidium bromide staining. Note that onconase-treated cells exhibited less apoptosis (Figure 7C), but had a more dramatic decrease in tRNA compared with doxorubicin-treated cells, suggesting that the degradation of tRNA in onconase-treated cells is not a secondary effect of apoptosis. The decrease of tRNA in doxorubicin-treated cells and the further decrease of tRNA in the cells treated with onconase plus doxorubicin were likely due to cell death.

Figure S1

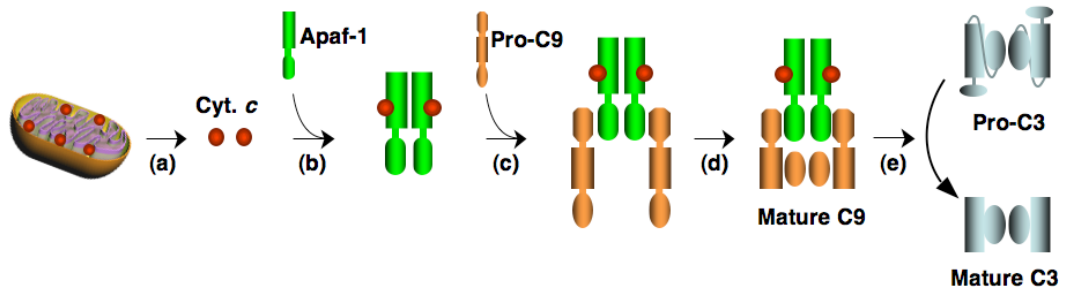

Figure S2

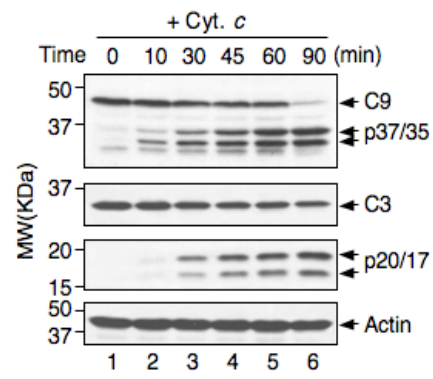

Figure S3

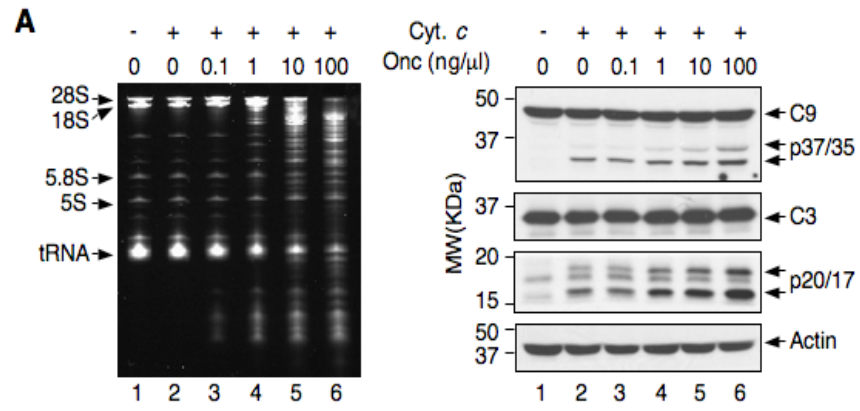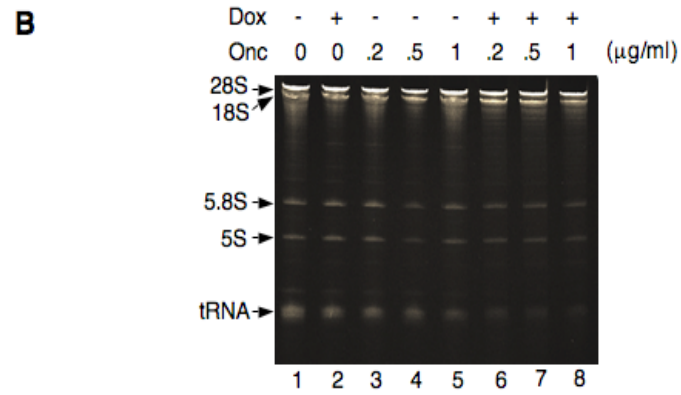

Supplement: NIHMS189148-supplement-01.pdf [file NIHMS189148-supplement-01.pdf]
